# Supplementary material for: Recyclable anhydride catalyst for H2O2 oxidation: N-oxidation of pyridine derivatives
Source: Royal Society of Chemistry journal article supplement (doi:10.1039/d0ra00265h), 2020-01-01
Supplement: d0ra00265h1.pdf [file d0ra00265h1.pdf]

## Supporting Information

### **Recyclable Anhydride Catalyst for H<sub>2</sub>O<sub>2</sub> Oxidation: N-oxidation of Pyridine Derivatives**

Ghellyn Gajeles, Se Mi Kim, Jong-Cheol Yoo, Kyung-Koo Lee, Sang Hee Lee\*

*Department of Chemistry, Kunsan National University, Gunsan 573-701, Republic of Korea*

Corresponding author's e-mail: [leesh@kunsan.ac.kr](mailto:leesh@kunsan.ac.kr)

## **<sup>1</sup>H NMR and <sup>13</sup>C NMR of N-Oxide products:**

### **2-carboxypyridine N-Oxide (C<sub>6</sub>H<sub>5</sub>NO<sub>3</sub>)**

$\delta$  <sup>1</sup>H NMR (500 MHz, DMSO): 7.88-7.95 (2H, m, Ar-H), 8.30-8.32 (1H, dd, J=2.5 Hz, 7.5 Hz, Ar-H), 8.73-8.74 (1H, m, Ar-H) ppm.

$\delta$  <sup>13</sup>C NMR (125 MHz, DMSO): 128.6, 130.1, 132.8, 135.9, 139.0, 160.9 ppm.

### **2-Chloropyridine N-Oxide (C<sub>5</sub>H<sub>4</sub>ClNO)**

$\delta$  <sup>1</sup>H NMR (500 MHz, CDCl<sub>3</sub>): 7.28-7.32 (2H, m, Ar-H), 7.55-7.58 (1H, m, Ar-H), 8.40-8.41 (1H, m, Ar-H) ppm.

$\delta$  <sup>13</sup>C NMR (125 MHz, CDCl<sub>3</sub> w/ DMSO): 123.8, 126.0, 126.9, 140.3, 141.5 ppm.

### **2-Methylpyridine N-Oxide**

$\delta$  <sup>1</sup>H NMR (500 MHz, CDCl<sub>3</sub>): 2.53 (3H, s, -CH<sub>3</sub>), 7.20-7.32 (3H, m, Ar-H), 8.29-8.30 (1H, d, J = 5.5 Hz, Ar-H)

$\delta$  <sup>13</sup>C NMR (125 MHz, CDCl<sub>3</sub>): 17.3, 123.2, 125.5, 126.1, 138.8, 148.5 ppm.

### **3-Bromopyridine N-Oxide**

$\delta$  <sup>1</sup>H NMR (500 MHz, CDCl<sub>3</sub>): 7.21-7.24 (1H, dd, J=6.6, 8.2 Hz, Ar-H), 7.45-7.47 (1H, dq, J=0.8, 8.3 Hz, Ar-H), 8.19-8.21 (1H, dq, J=0.8, 6.5 Hz, Ar-H), 8.39-8.40 (1H, t, J=1.5 Hz, Ar-H) ppm.

$\delta$  <sup>13</sup>C NMR (125 MHz, CDCl<sub>3</sub>): 120.2, 125.9, 128.7, 137.7, 140.3 ppm.

#### **4-Methylpyridine N-Oxide**

$\delta$   $^1\text{H}$  NMR (500 MHz,  $\text{CDCl}_3$ ): 2.37 (3H, s, -CH<sub>3</sub>), 7.12 (2H, s, Ar-H), 8.13 (2H, s, Ar-H) ppm.

$\delta$   $^{13}\text{C}$  NMR (125 MHz,  $\text{CDCl}_3$ ): 20.1, 126.6, 138.0, 138.4 ppm.

#### **Nicotinic N-Oxide**

$\delta$   $^1\text{H}$  NMR (500 MHz, DMSO): 7.53-7.55 (1H, dd,  $J=6.8, 7.5$  Hz, Ar-H), 7.76-7.78 (1H, d,  $J=8$  Hz, Ar-H), 8.42-8.44 (1H, dd,  $J=0.7, 6.4$  Hz, Ar-H), 8.48 (1H, s, Ar-H) ppm.

$\delta$   $^{13}\text{C}$  NMR (125 MHz, DMSO): 126.1, 127.2, 131.1, 139.4, 142.6, 164.7 ppm.

#### **Pyridine N-Oxide**

$\delta$   $^1\text{H}$  NMR (500 MHz,  $\text{CDCl}_3$ ): 7.35-7.37 (3H, m, Ar-H), 8.25-8.27 (2H, m, Ar-H) ppm.

$\delta$   $^{13}\text{C}$  NMR (125 MHz,  $\text{CDCl}_3$ ): 125.3, 125.5, 138.5 ppm.

#### **Quinoline N-Oxide**

$\delta$   $^1\text{H}$  NMR (500 MHz,  $\text{CDCl}_3$ ): 7.29-7.32 (1H, dd,  $J=6.0, 8.5$  Hz, Ar-H), 7.62-7.65 (1H, t,  $J=7.5$  Hz, Ar-H), 7.74-7.77 (2H, m, Ar-H), 7.86-7.87 (1H, d,  $J=8.5$  Hz, Ar-H), 8.54-8.56 (1H, d,  $J=6$  Hz, Ar-H), 8.73-8.75 (1H, d,  $J=9$  Hz, Ar-H) ppm.

$\delta$   $^{13}\text{C}$  NMR (125 MHz,  $\text{CDCl}_3$ ): 119.4, 120.7, 126.2, 127.9, 128.5, 130.2, 130.3, 135.4, 141.1 ppm.

## Zinc Pyrithione

$\delta$   $^1\text{H}$  NMR (500 MHz, DMSO): 6.99-7.02 (1H, td,  $J=2\text{Hz}$ , 7Hz, Ar-H), 7.23-7.26 (1H, m, Ar-H), 7.60-7.62 (1H x 2, dd,  $J=1.5$ , 8.5 Hz, Ar-H), 8.42-8.44 (1H x 2, dd,  $J=1.0$ , 6.5 Hz, Ar-H) ppm.

$\delta$   $^{13}\text{C}$  NMR (125 MHz, DMSO): 117.9, 128.4, 129.3, 137.3, 159.3 ppm.

### Figures:

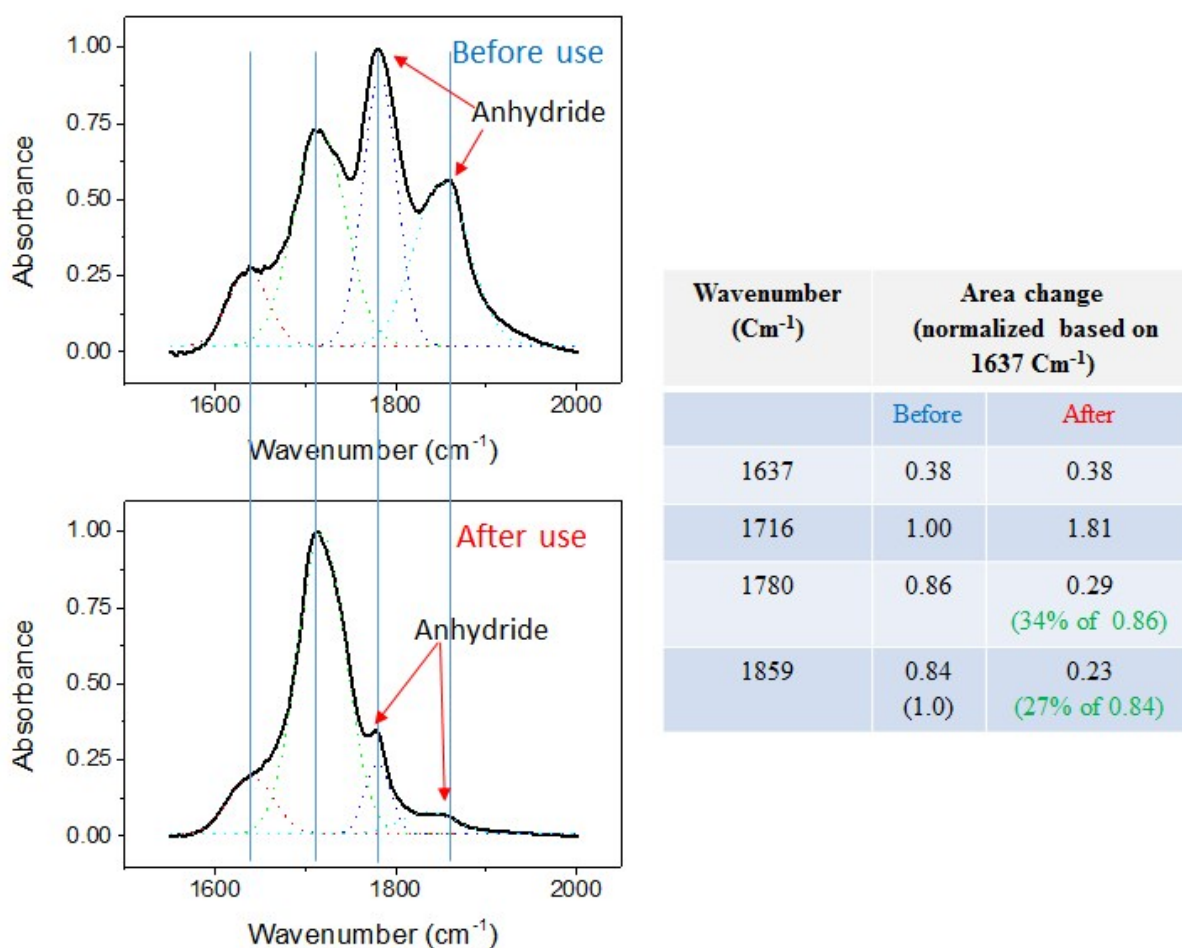

Figure S1. IR spectrum of Od-MA before and after use in oxidation reaction.

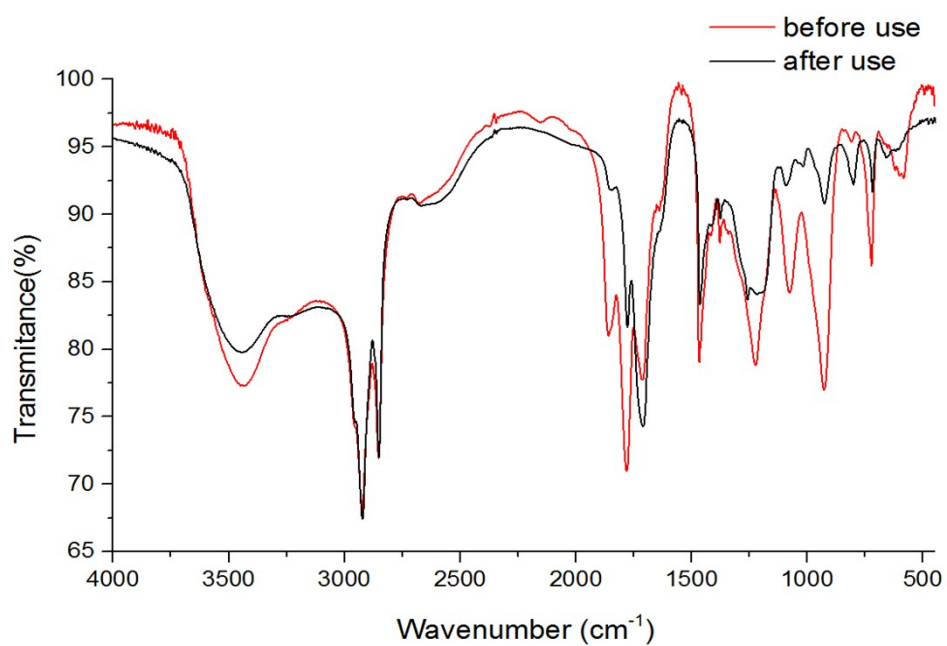

Figure S2. IR spectrum of Od-MA before and after use in oxidation reaction.

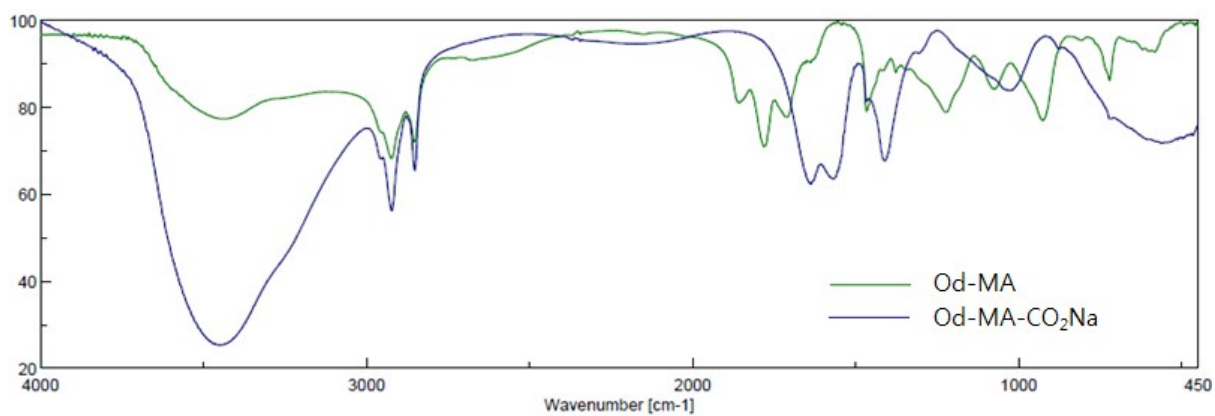

Figure S3. IR spectrum of Od-MA-CO<sub>2</sub>Na.

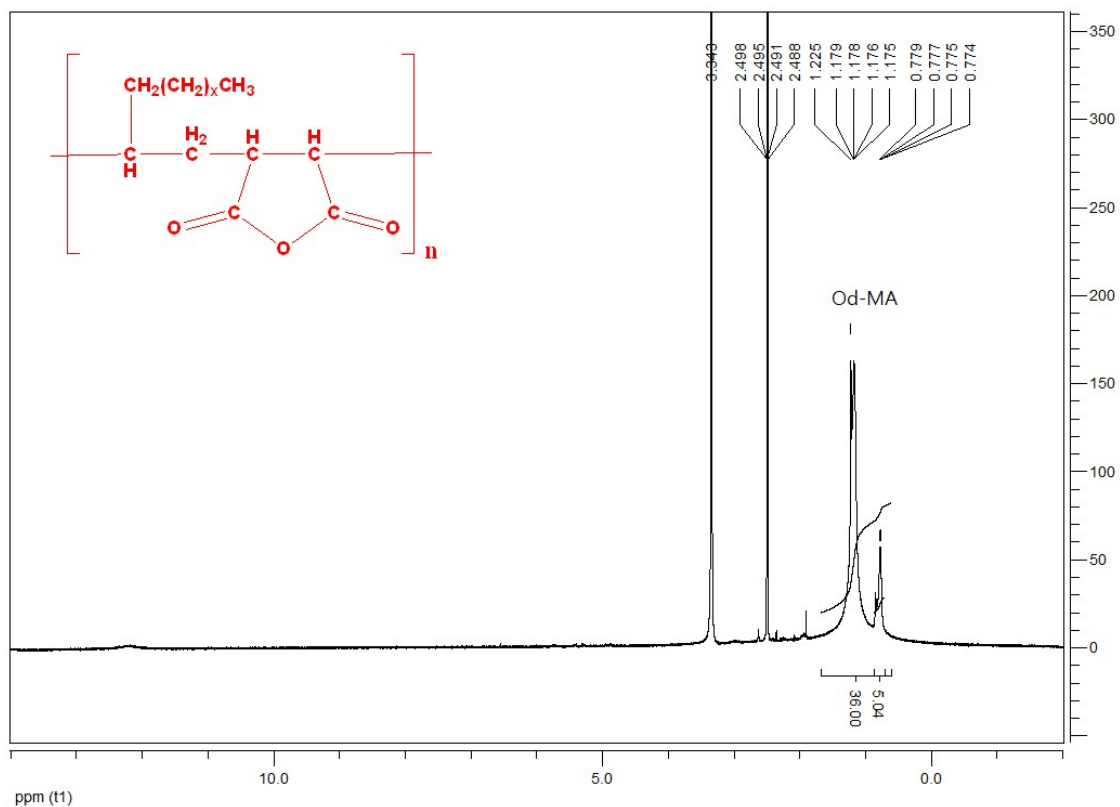

Figure S4.  $^1\text{H}$  NMR spectrum of fresh Od-MA.

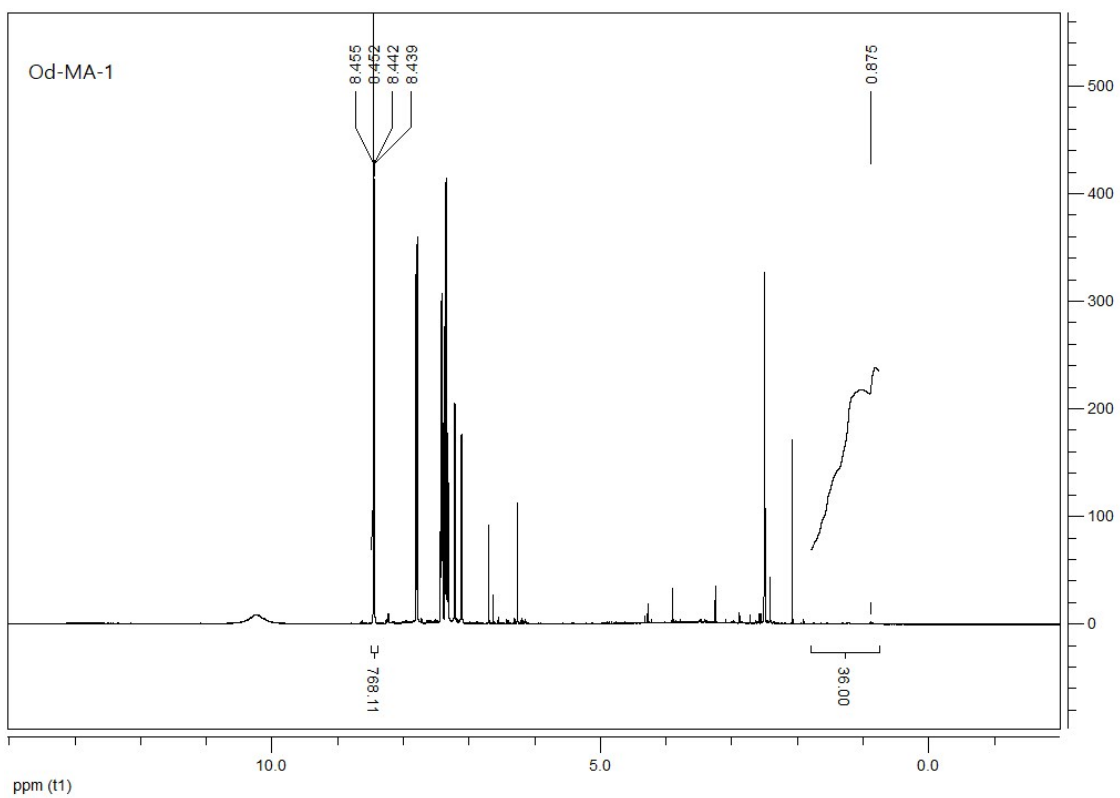

Figure S5.  $^1\text{H}$  NMR spectrum of aqueous layer after 1st oxidation reaction using Od-MA.

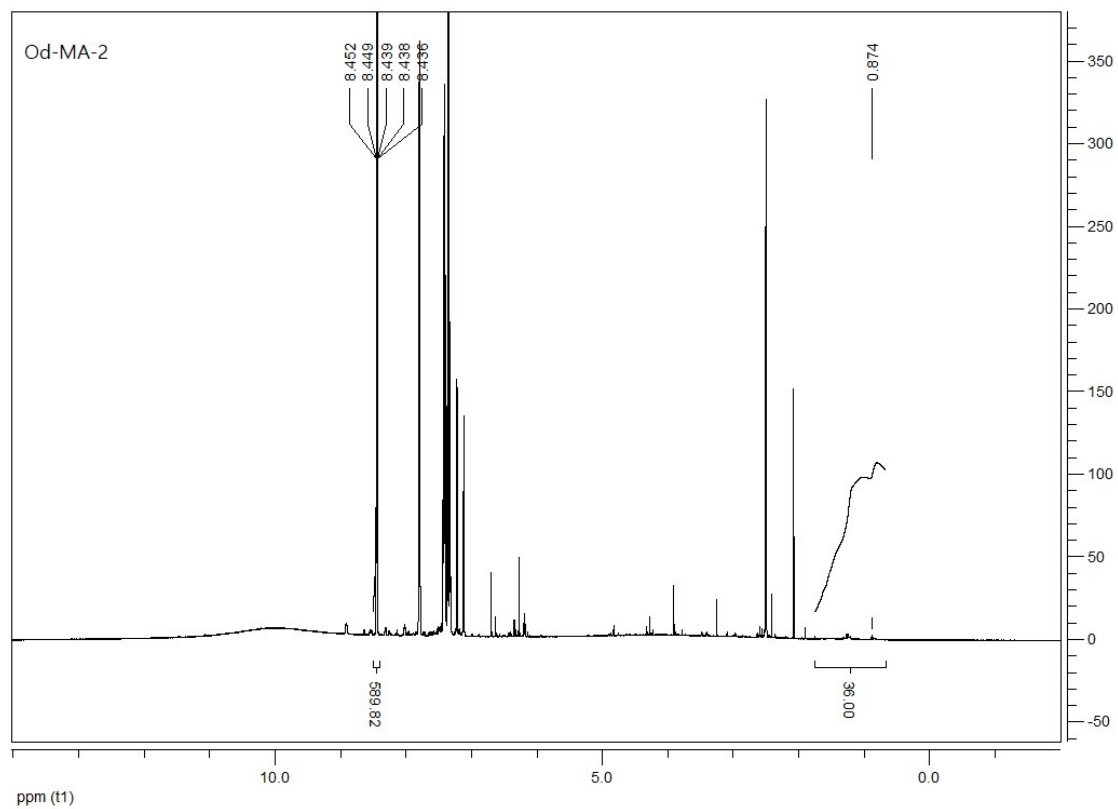

Figure S6. <sup>1</sup>H NMR spectrum of aqueous layer after 2nd oxidation reaction using Od-MA.

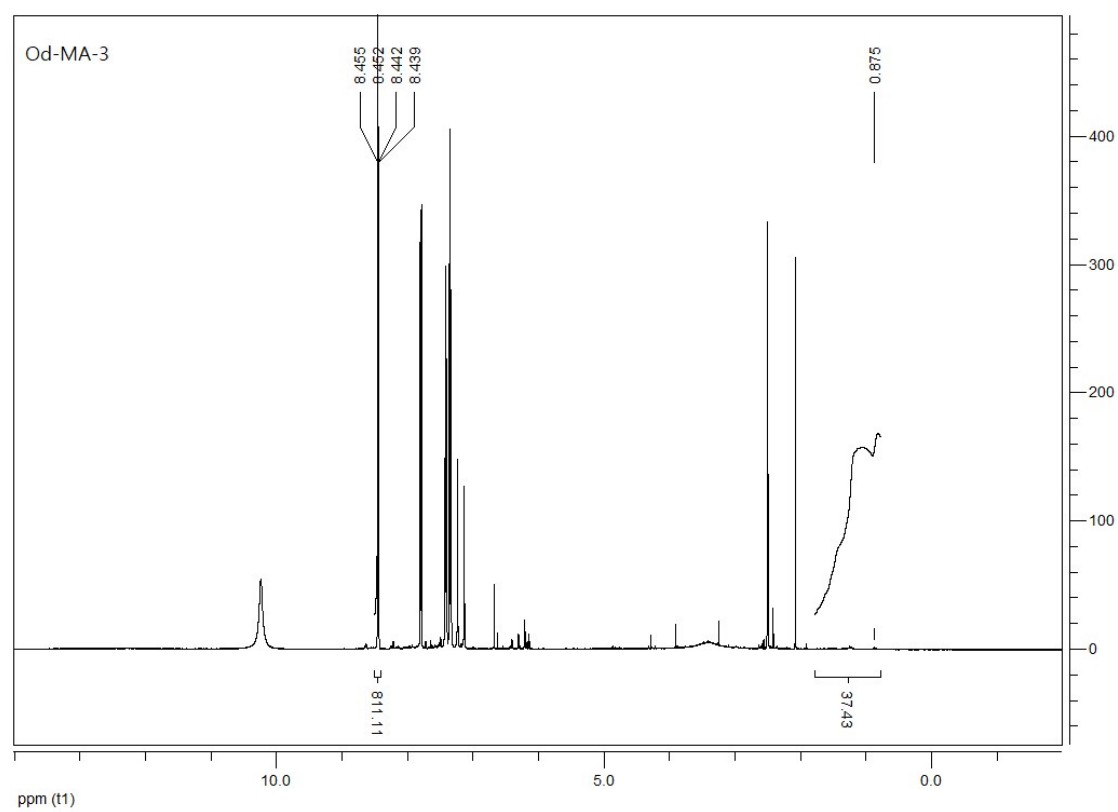

Figure S7. <sup>1</sup>H NMR spectrum of aqueous layer after 3rd oxidation reaction using Od-MA.

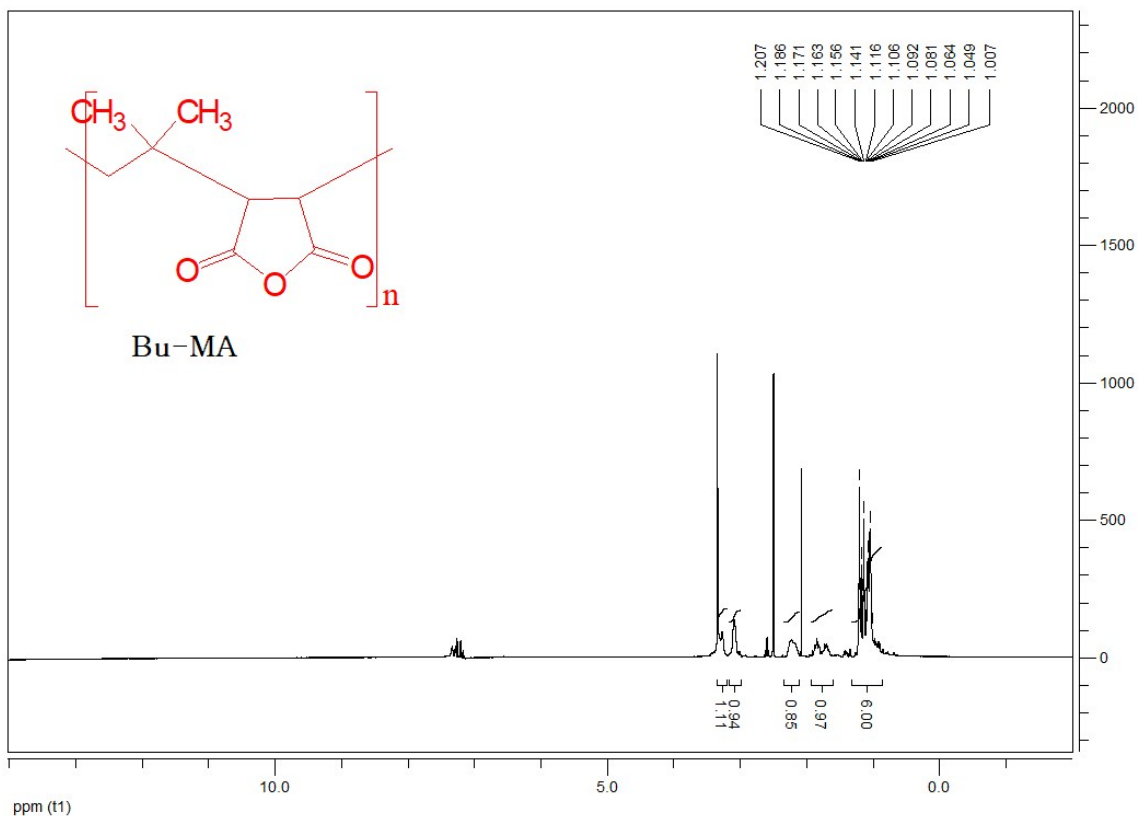

Figure S8.  $^1\text{H}$  NMR (DMSO- $d_6$ ) of fresh Bu-MA.

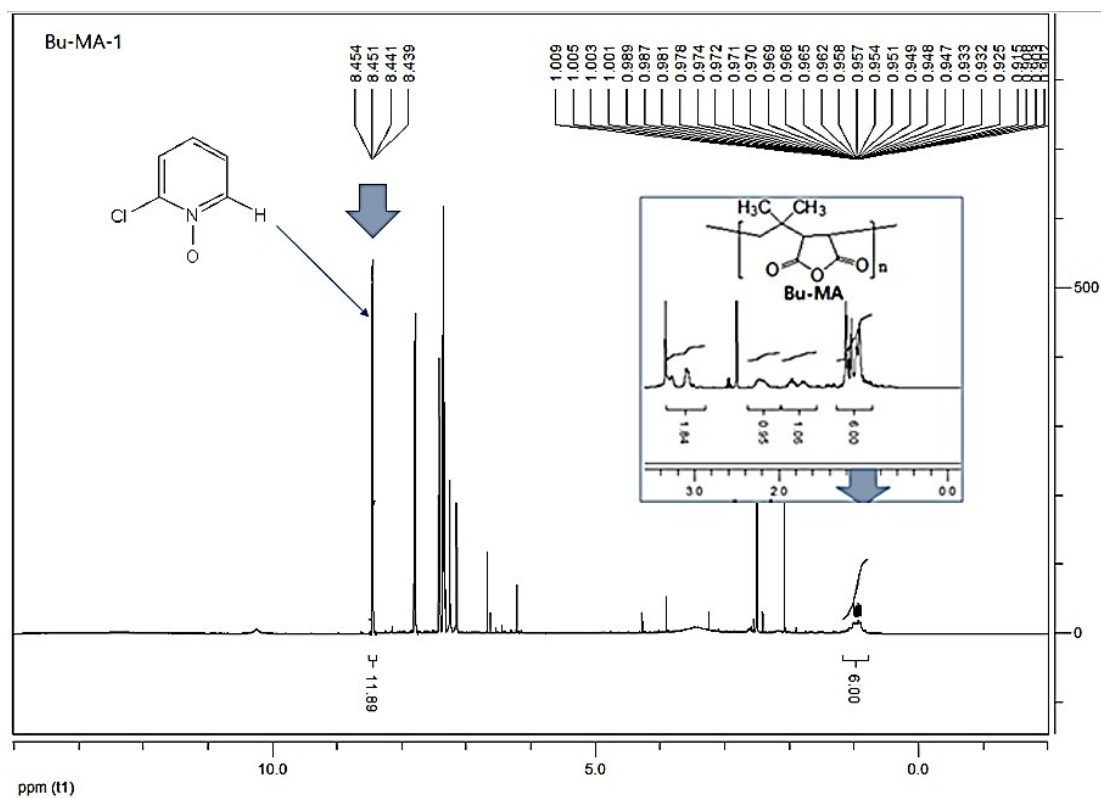

Figure S9.  $^1\text{H}$  NMR spectrum of aqueous layer after 1st oxidation reaction using Bu-MA.



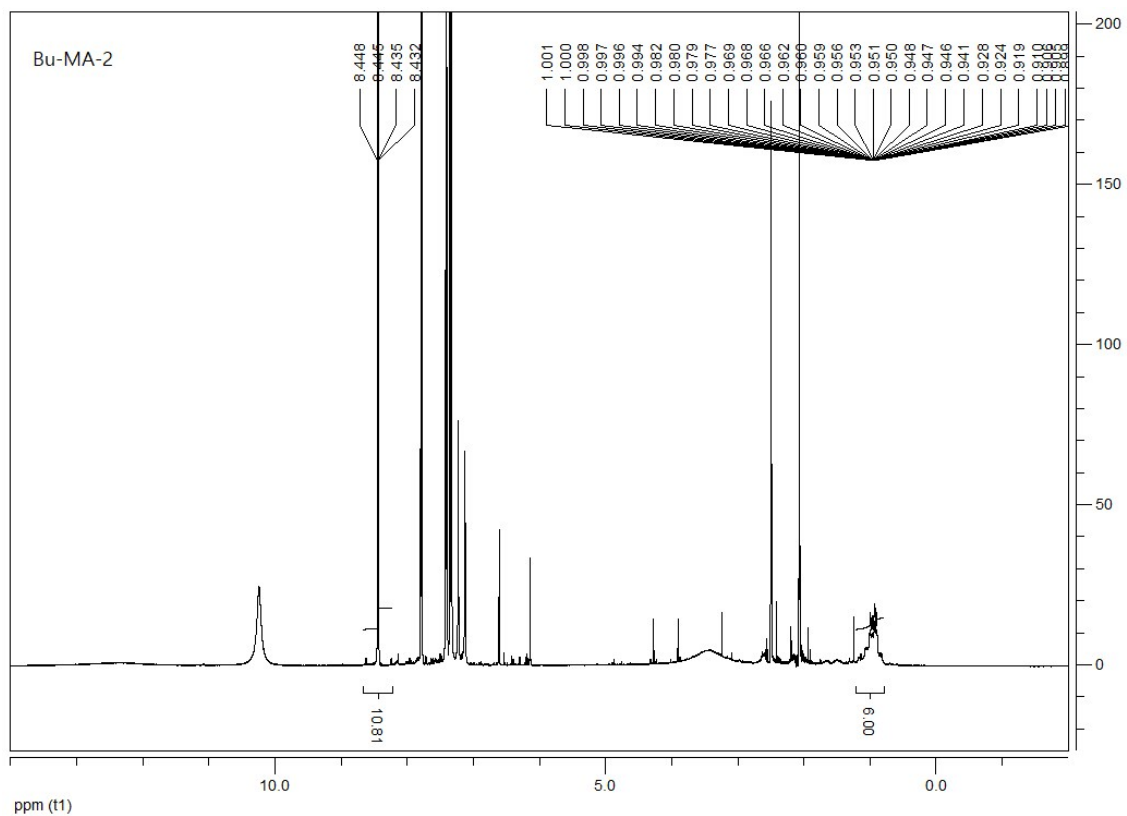

Figure S10.  $^1\text{H}$  NMR spectrum of aqueous layer after 2nd oxidation reaction using Bu-MA.

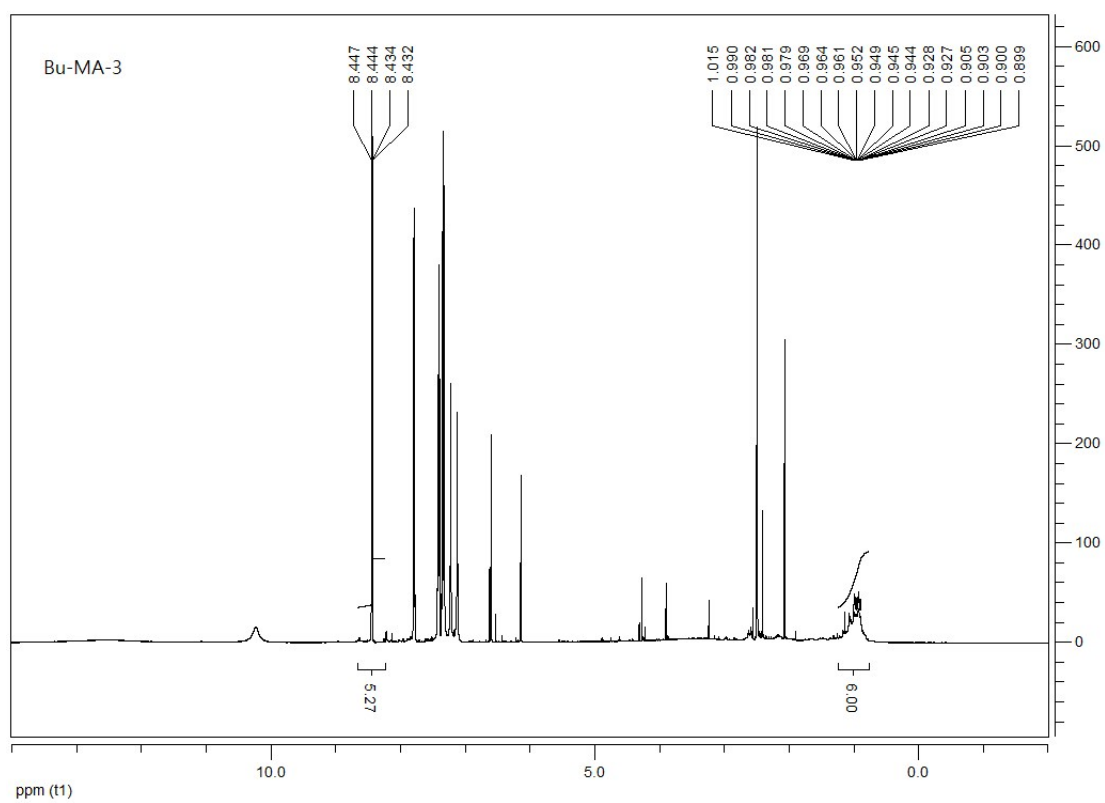

Figure S11.  $^1\text{H}$  NMR spectrum of aqueous layer after 3rd oxidation reaction using Bu-MA.

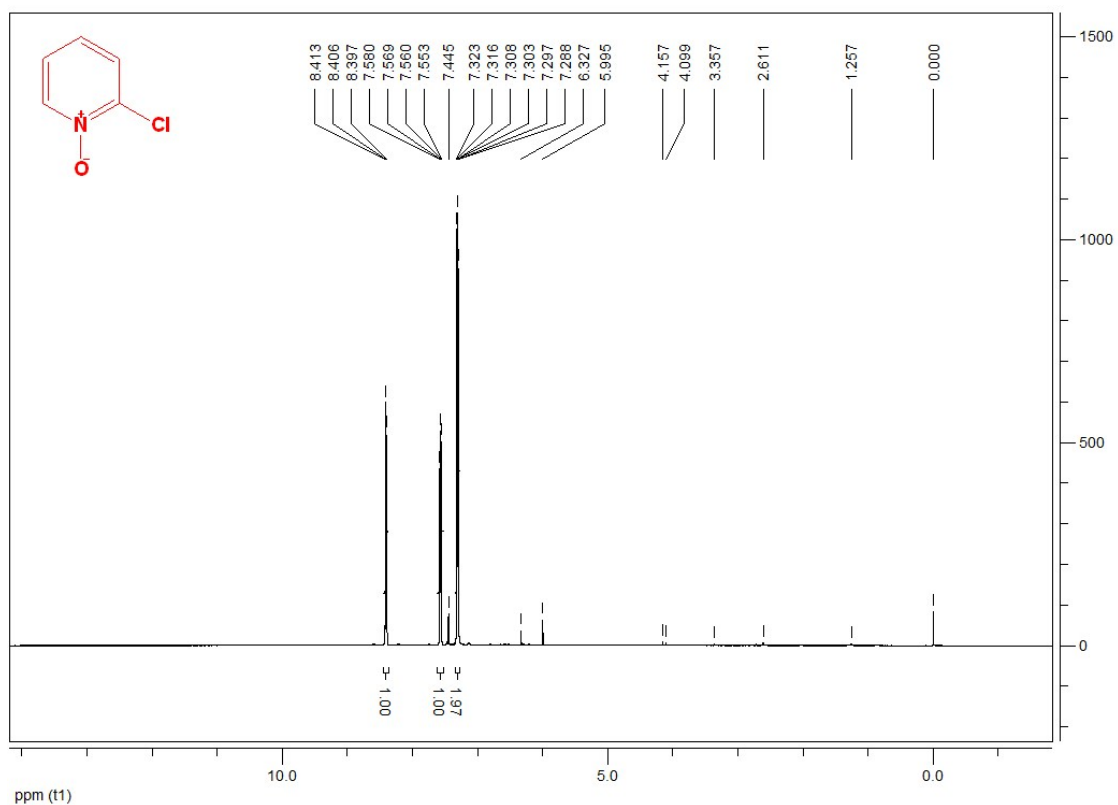

Figure S12.  $^1\text{H}$  NMR spectrum of 2-Chloropyridine N-oxide.

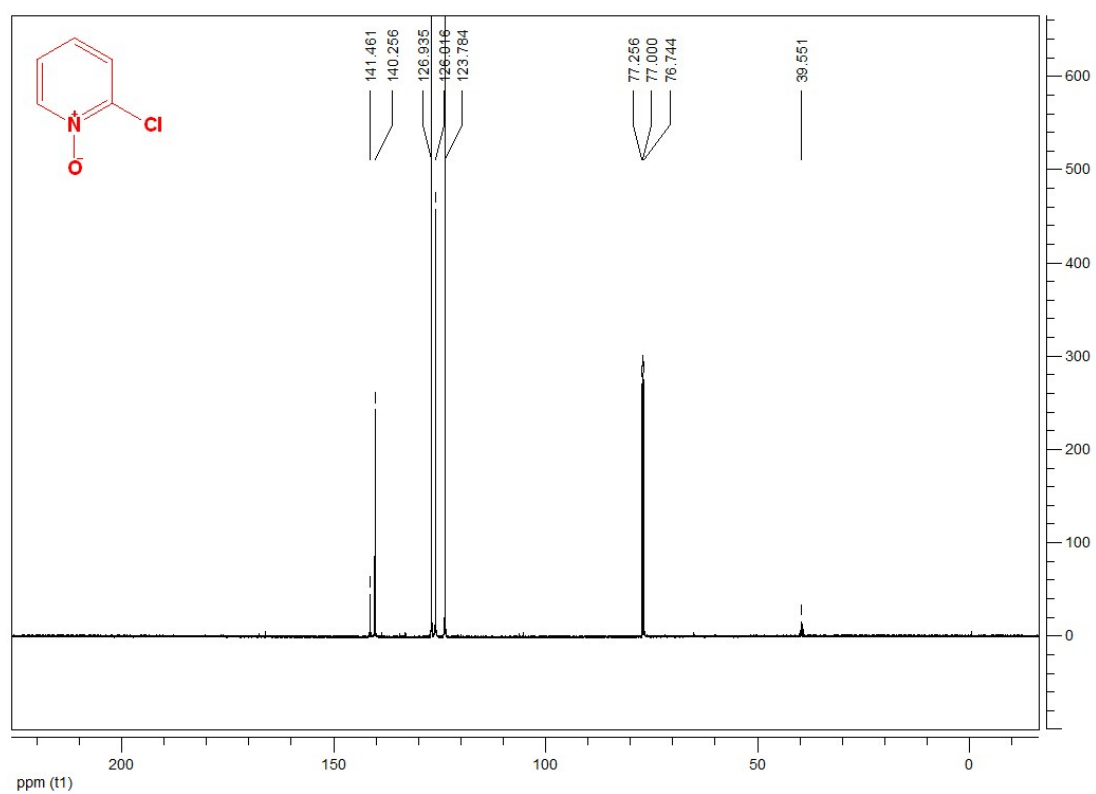

Figure S13.  $^{13}\text{C}$  NMR of 2-Chloropyridine N-oxide.

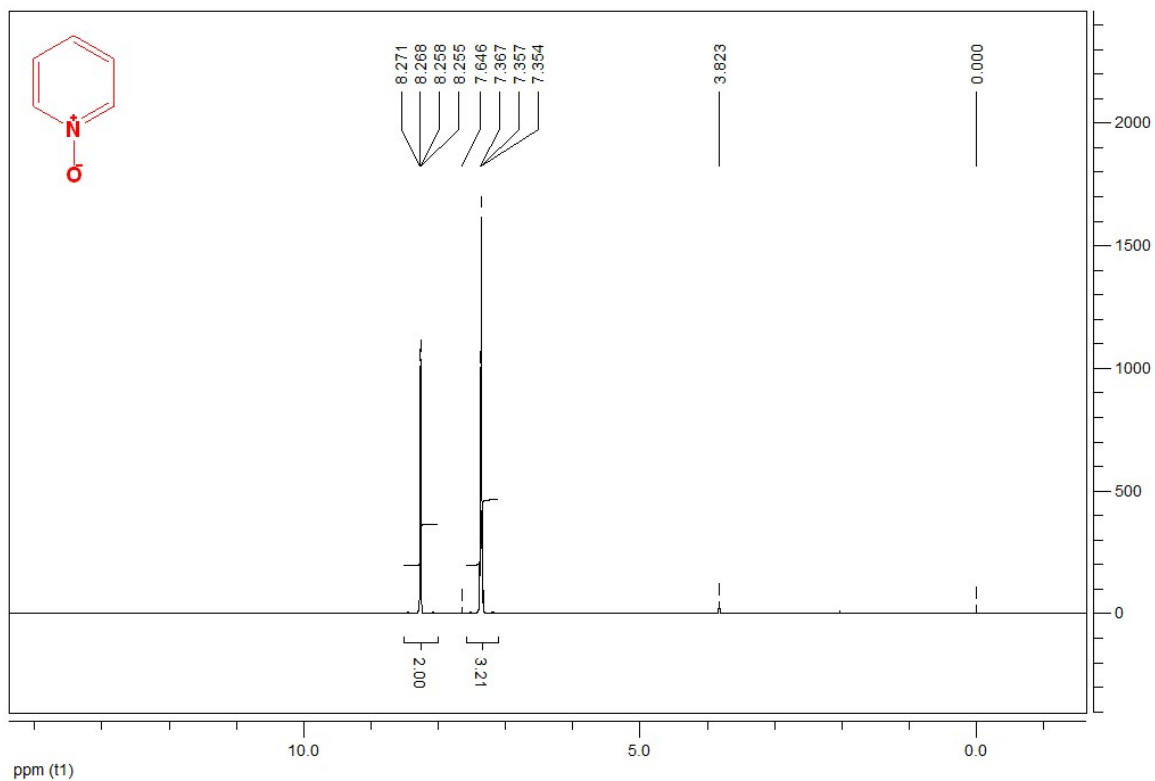

Figure S14.  $^1\text{H}$  NMR spectrum of Pyridine N-Oxide.

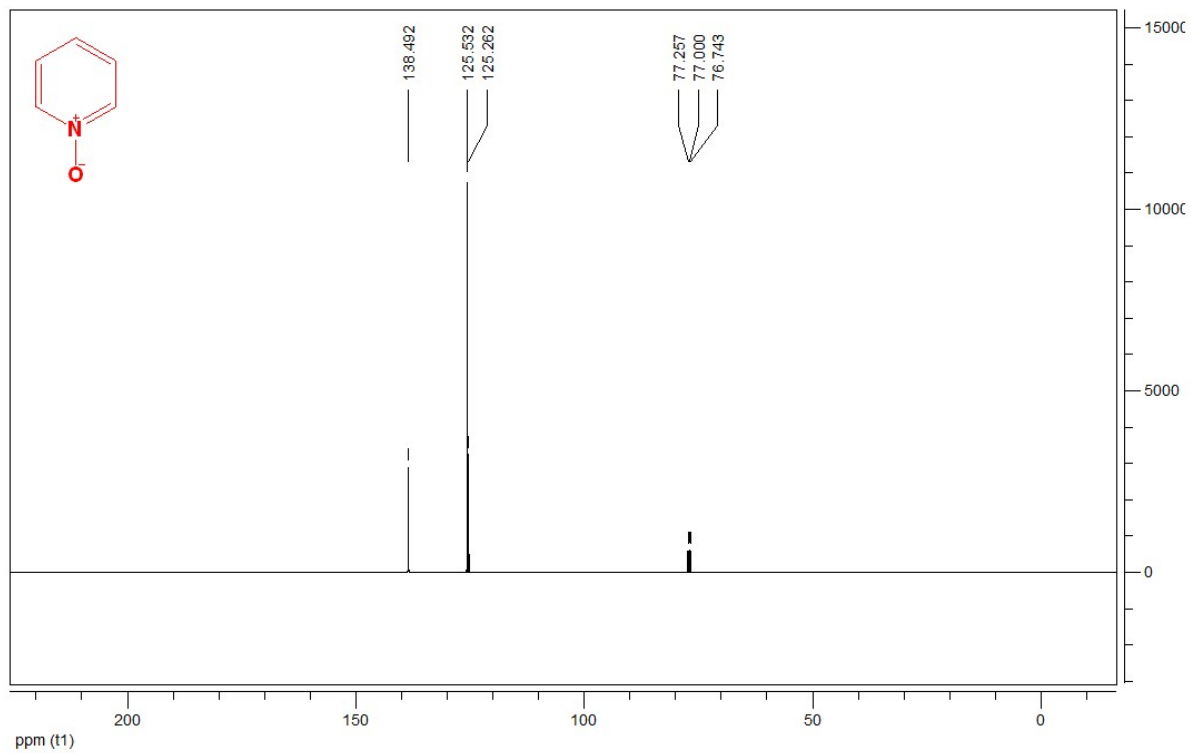

Figure S15.  $^{13}\text{C}$  NMR spectrum of Pyridine N-Oxide.

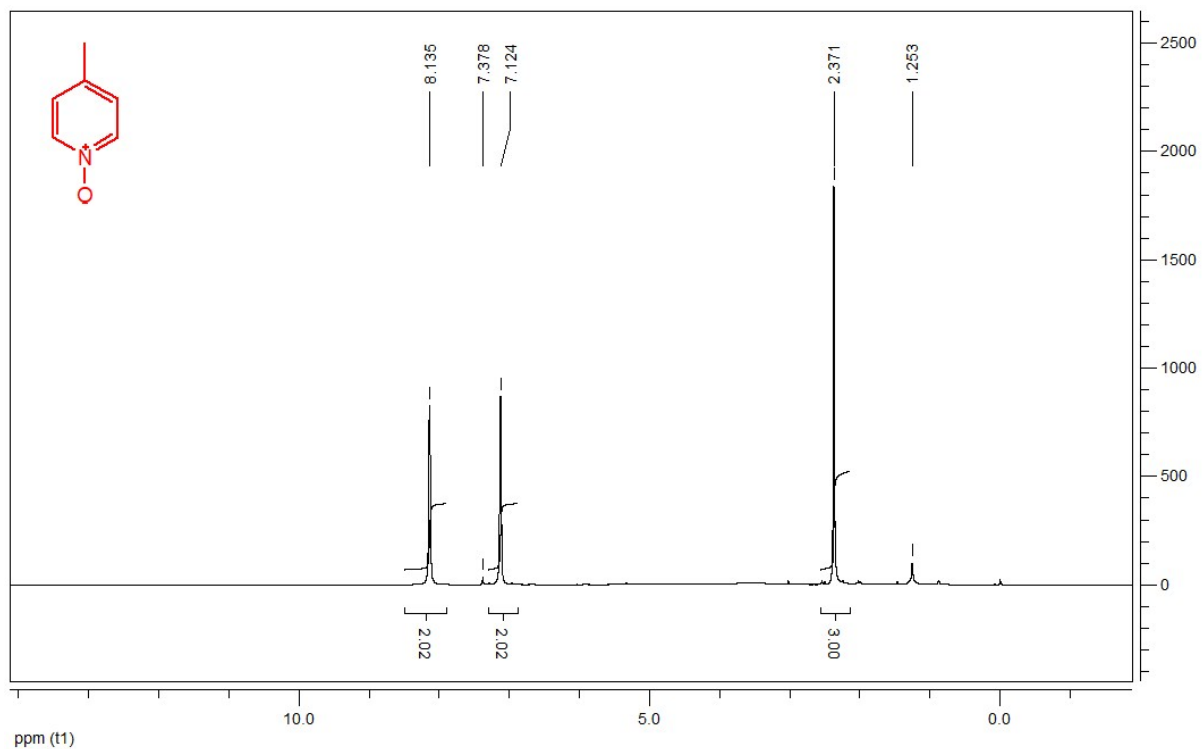

Figure S16.  $^1\text{H}$  NMR spectrum of 4-Methylpyridine N-Oxide.

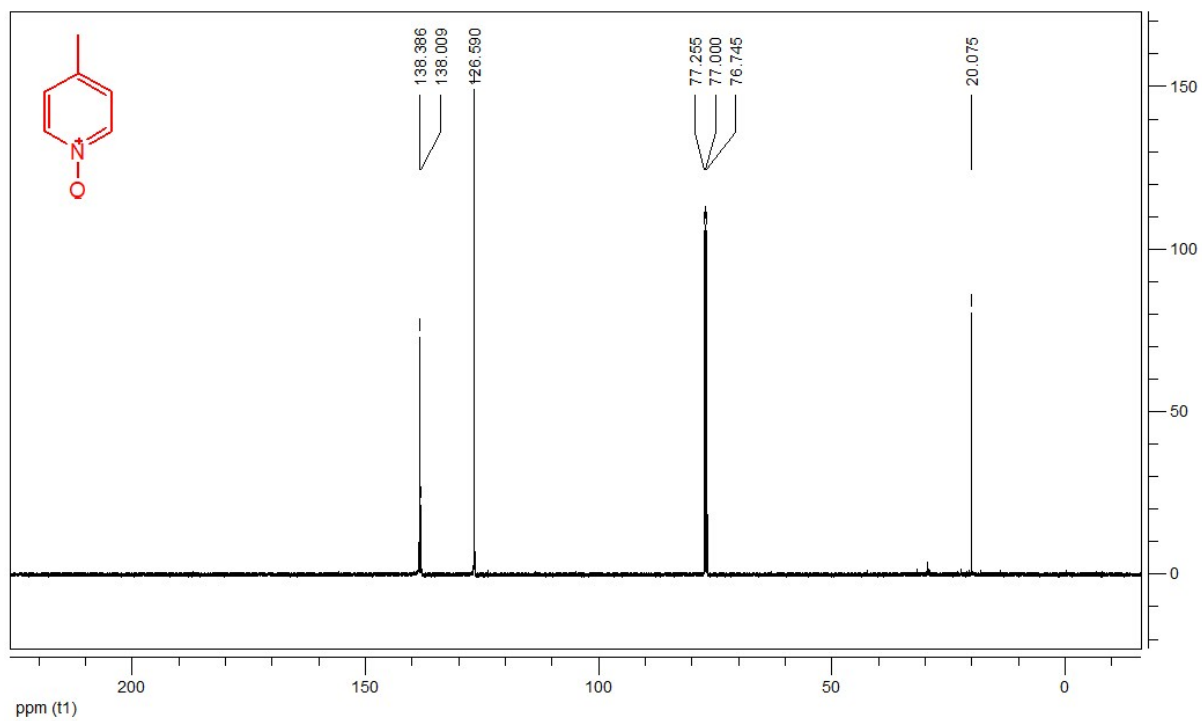

Figure S17.  $^{13}\text{C}$  NMR spectrum of 4-Methylpyridine N-Oxide.

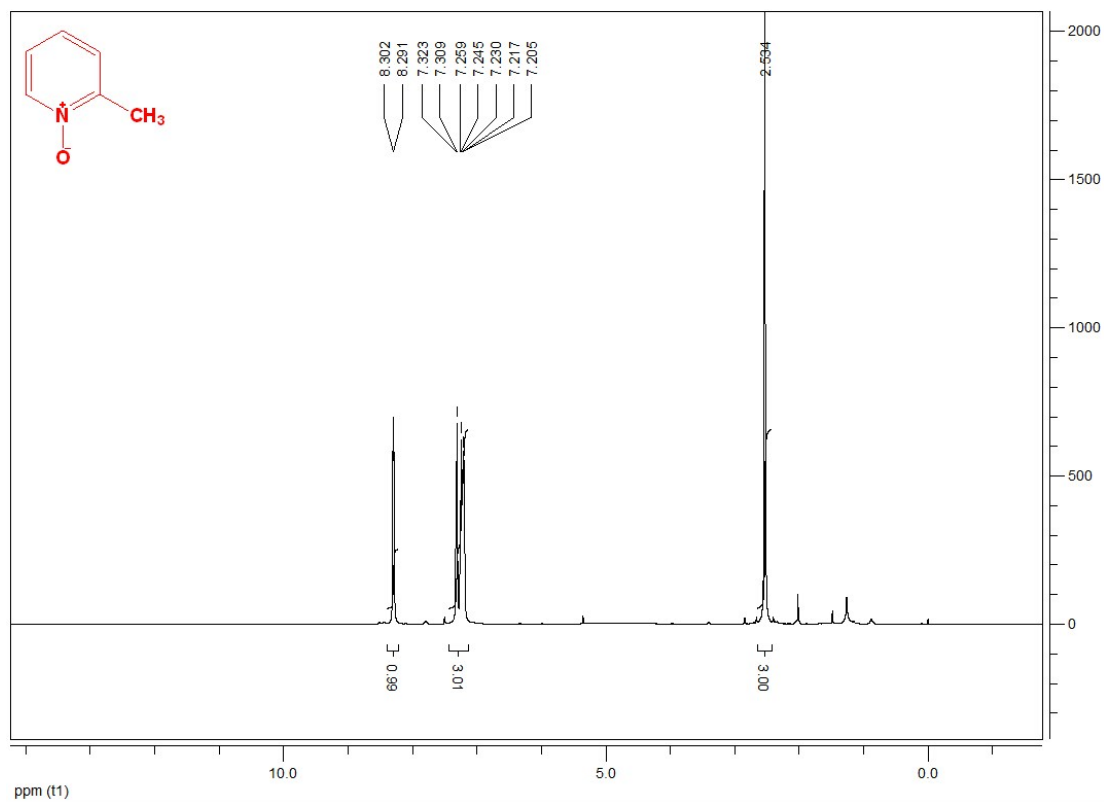

Figure S18. <sup>1</sup>H NMR spectrum of 2-Methylpyridine N-Oxide.

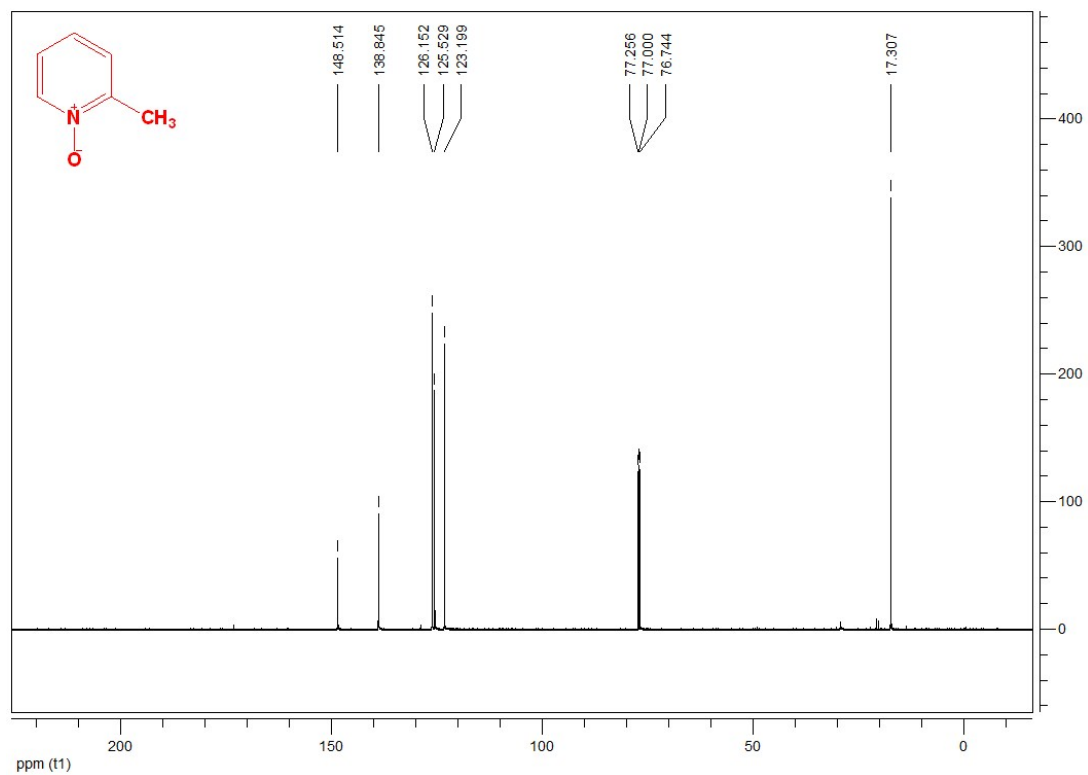

Figure S19. <sup>13</sup>C NMR spectrum of 2-Methylpyridine N-Oxide.

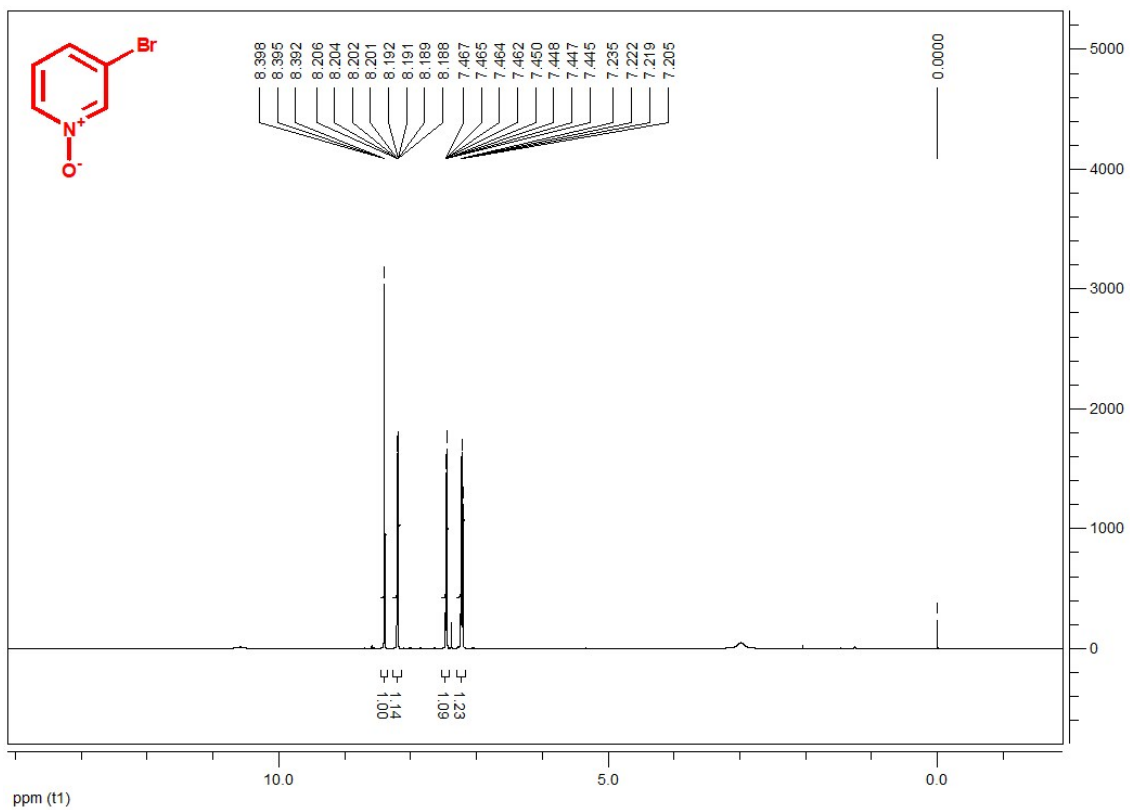

Figure S20.  $^1\text{H}$  NMR spectrum of 3-Bromopyridine N-Oxide.

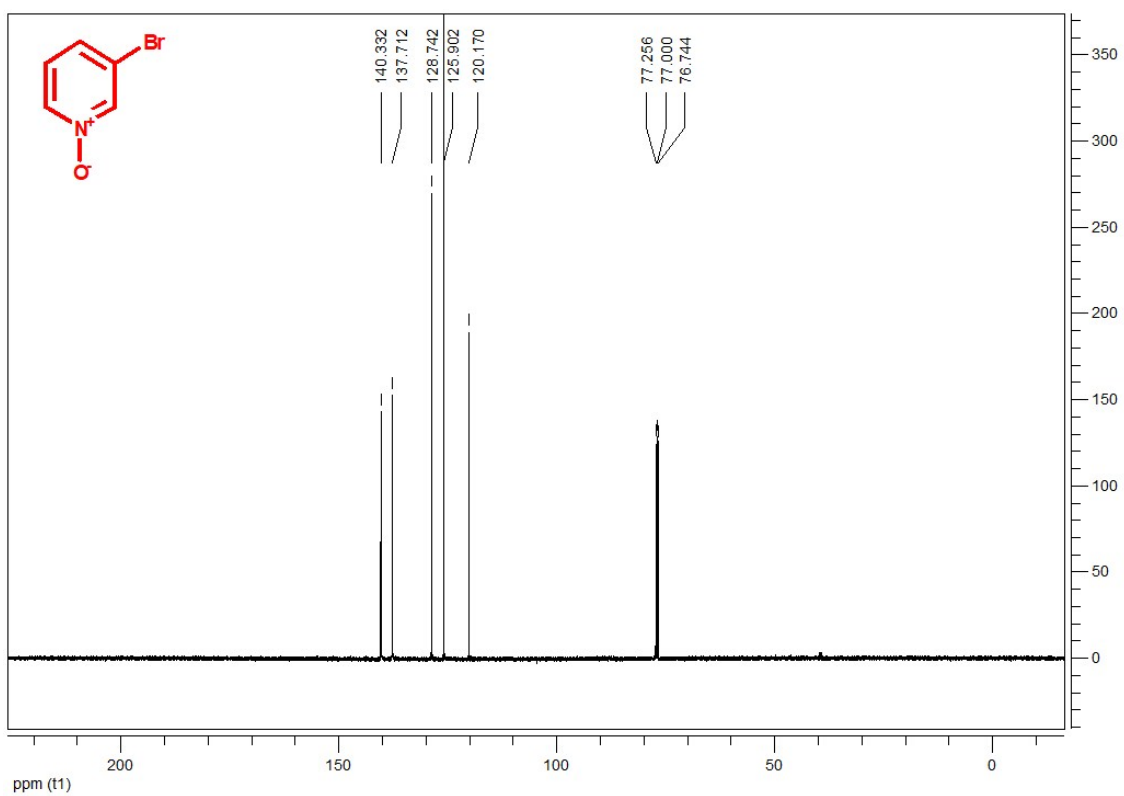

Figure S21.  $^{13}\text{C}$  NMR spectrum of 3-Bromopyridine N-Oxide.

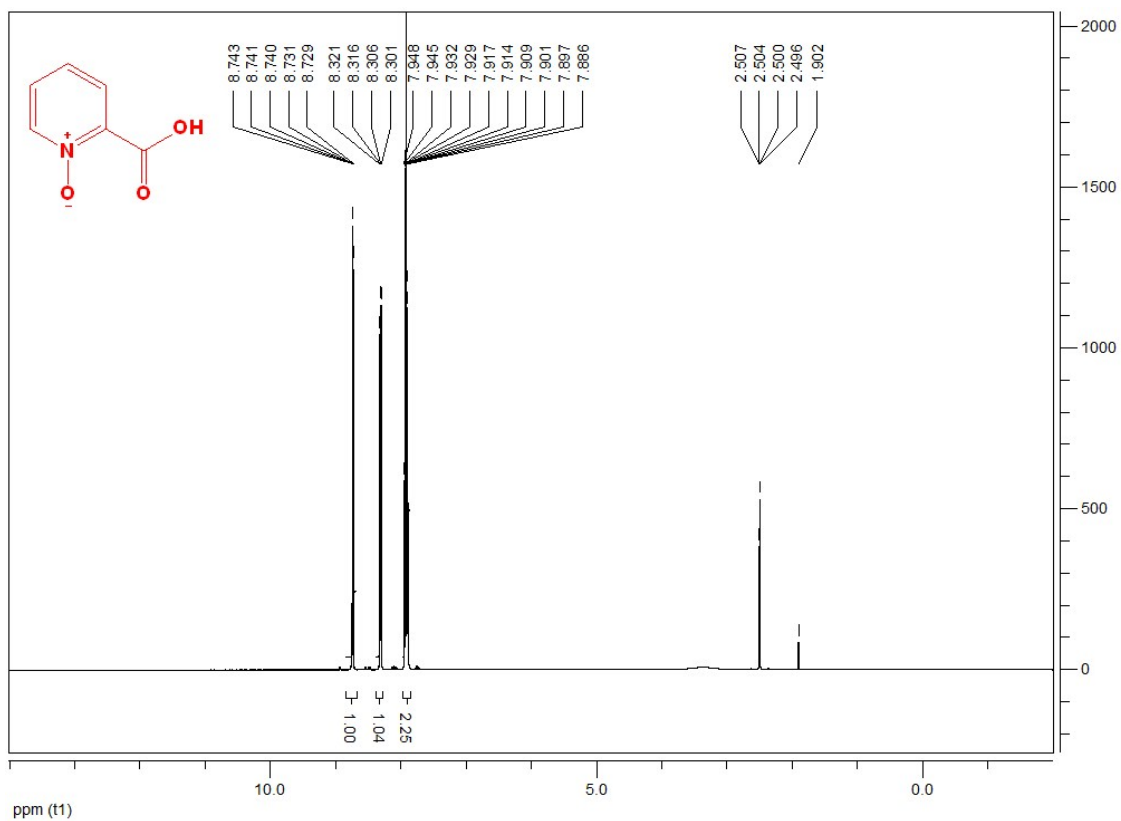

Figure S22. <sup>1</sup>H NMR spectrum of 2-Carboxypyridine N-Oxide.

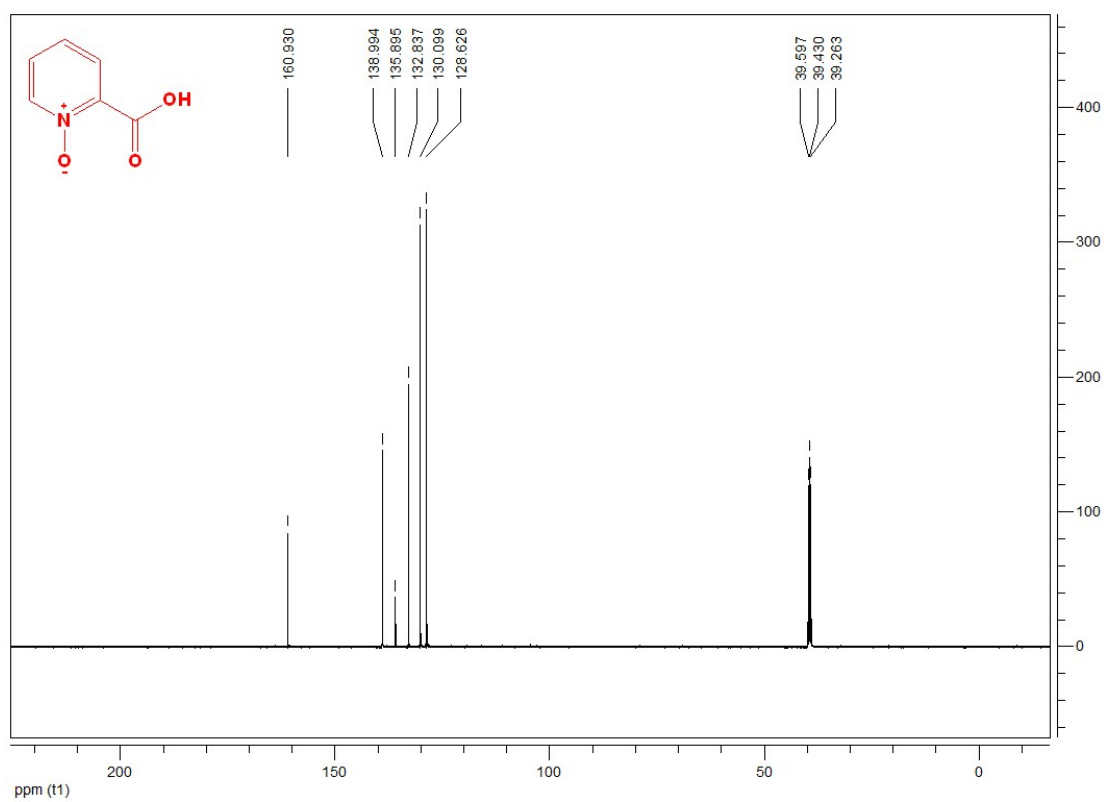

Figure S23. <sup>13</sup>C NMR spectrum of 2-Carboxypyridine N-Oxide.

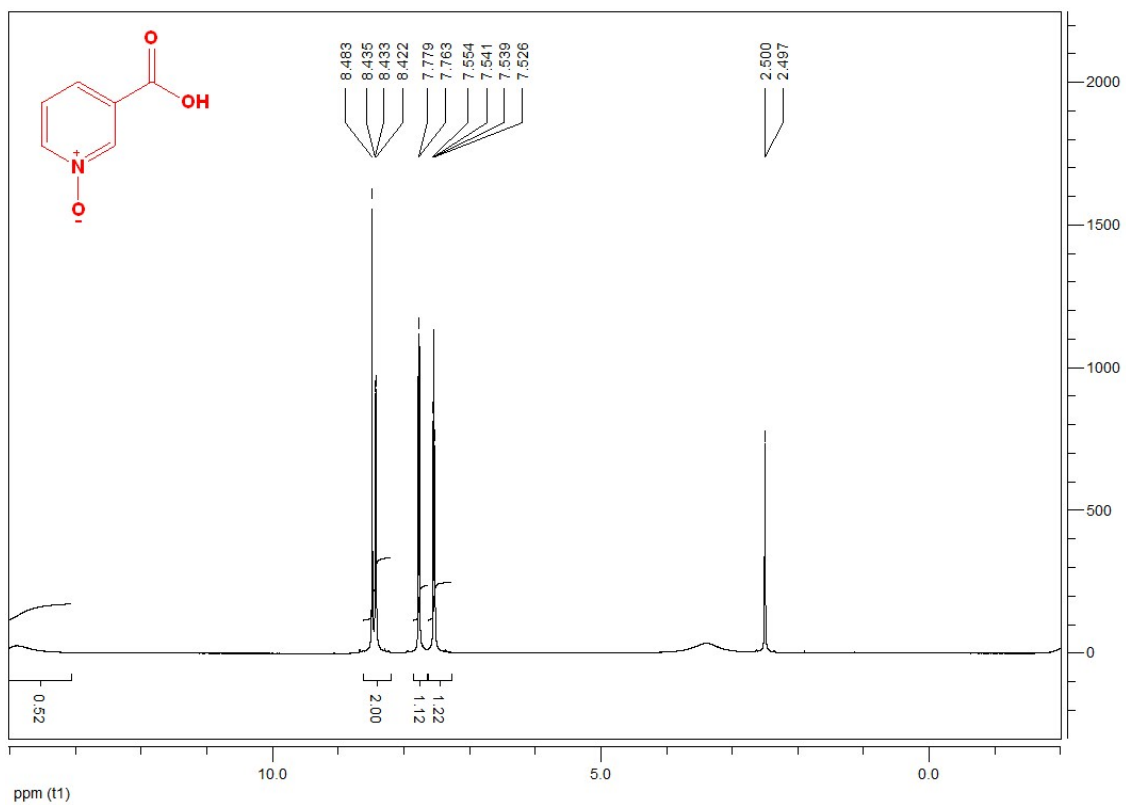

Figure S24.  $^1\text{H}$  NMR spectrum of Nicotinic N-Oxide.

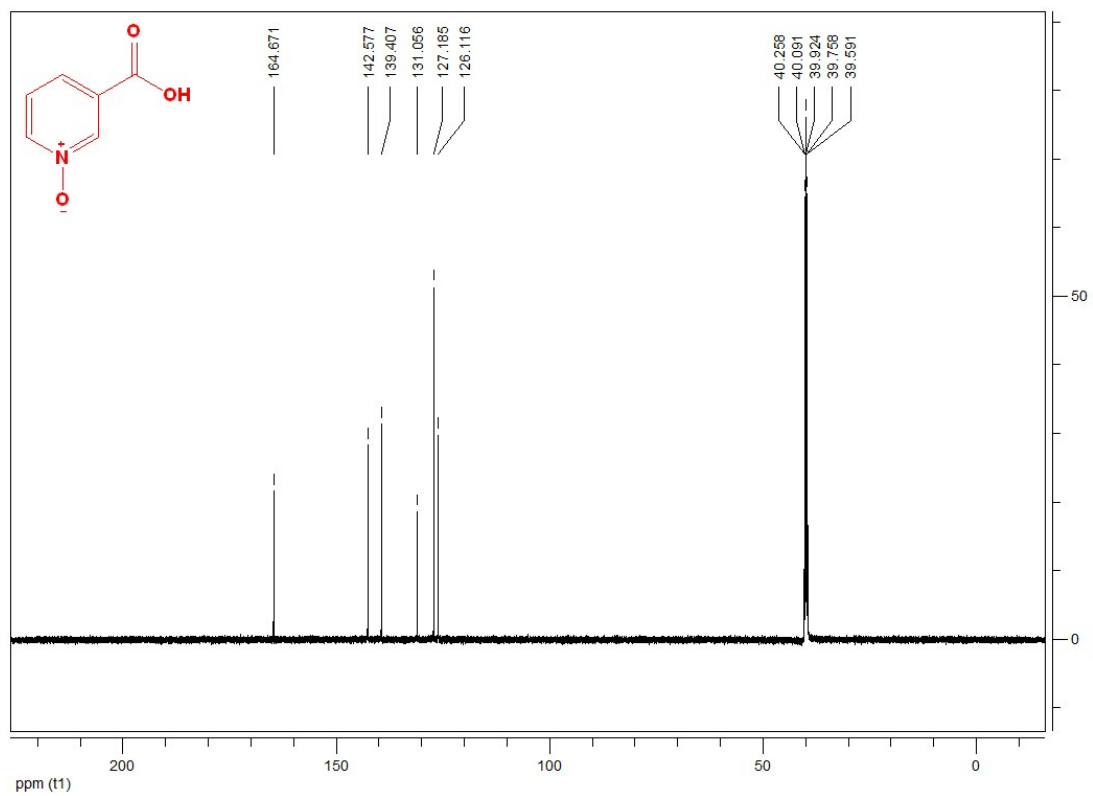

Figure S25.  $^{13}\text{C}$  NMR spectrum of Nicotinic N-Oxide.



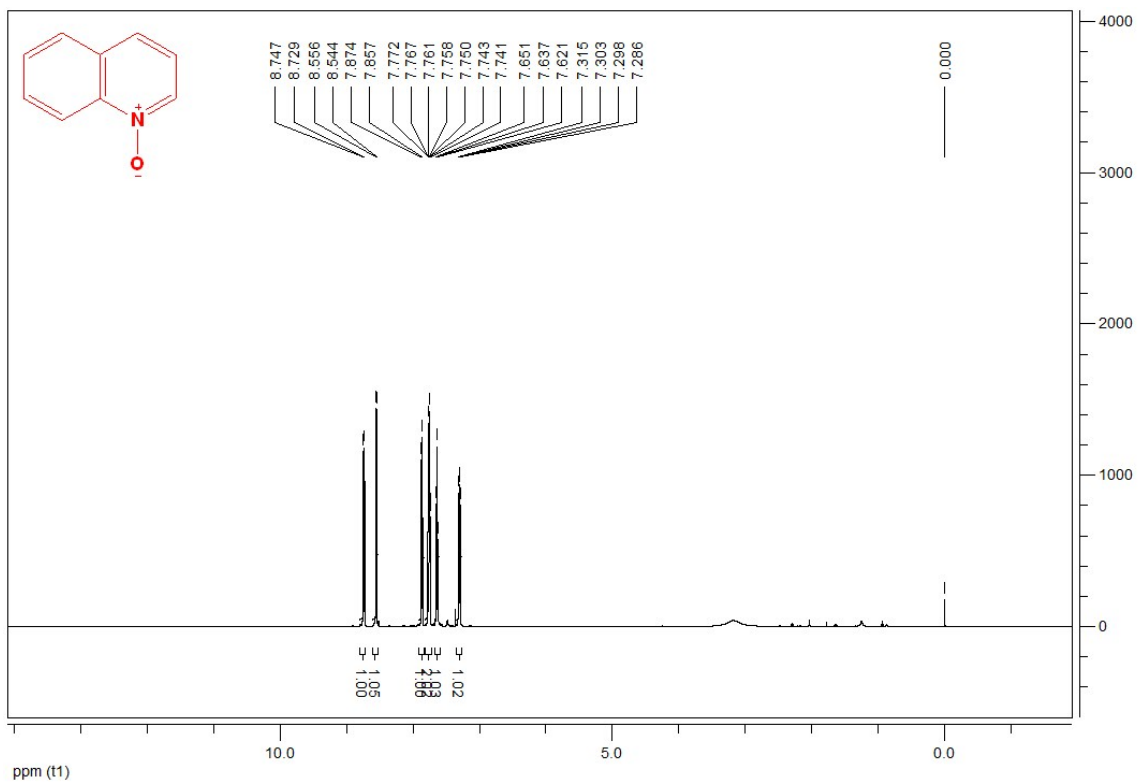

Figure S26.  $^1\text{H}$  NMR spectrum of Quinoline N-Oxide.

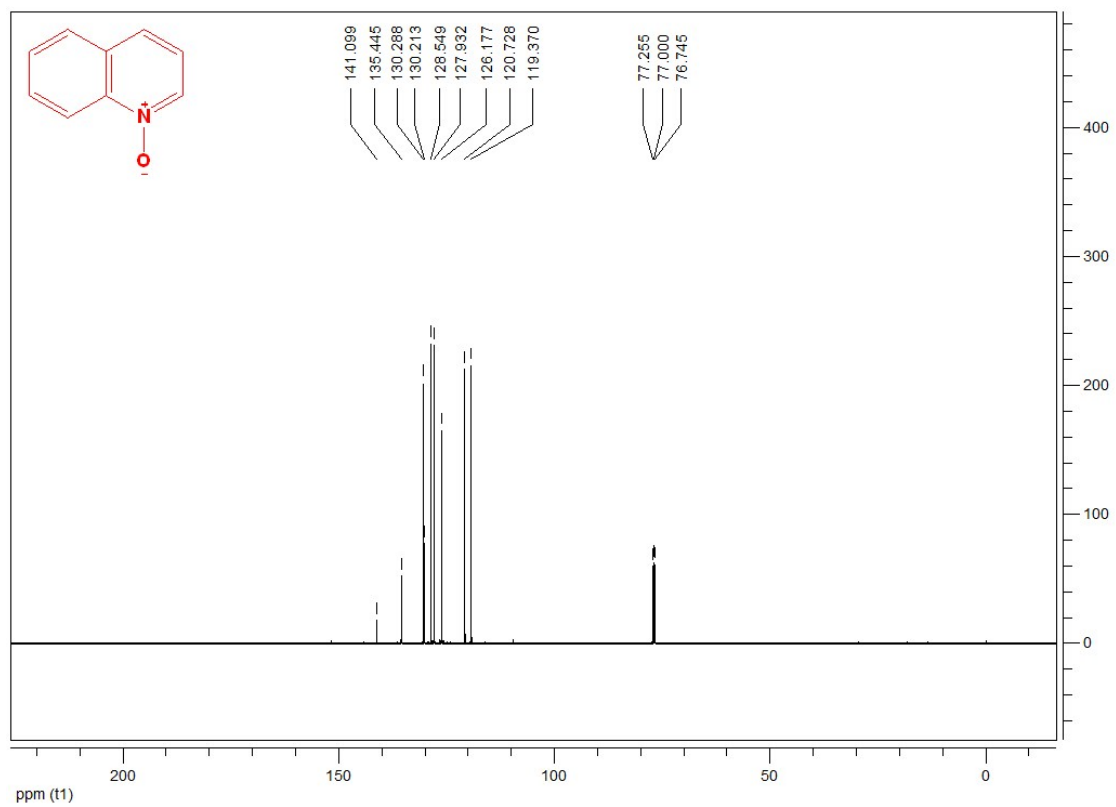

Figure S27.  $^{13}\text{C}$  NMR spectrum of Quinoline N-Oxide.

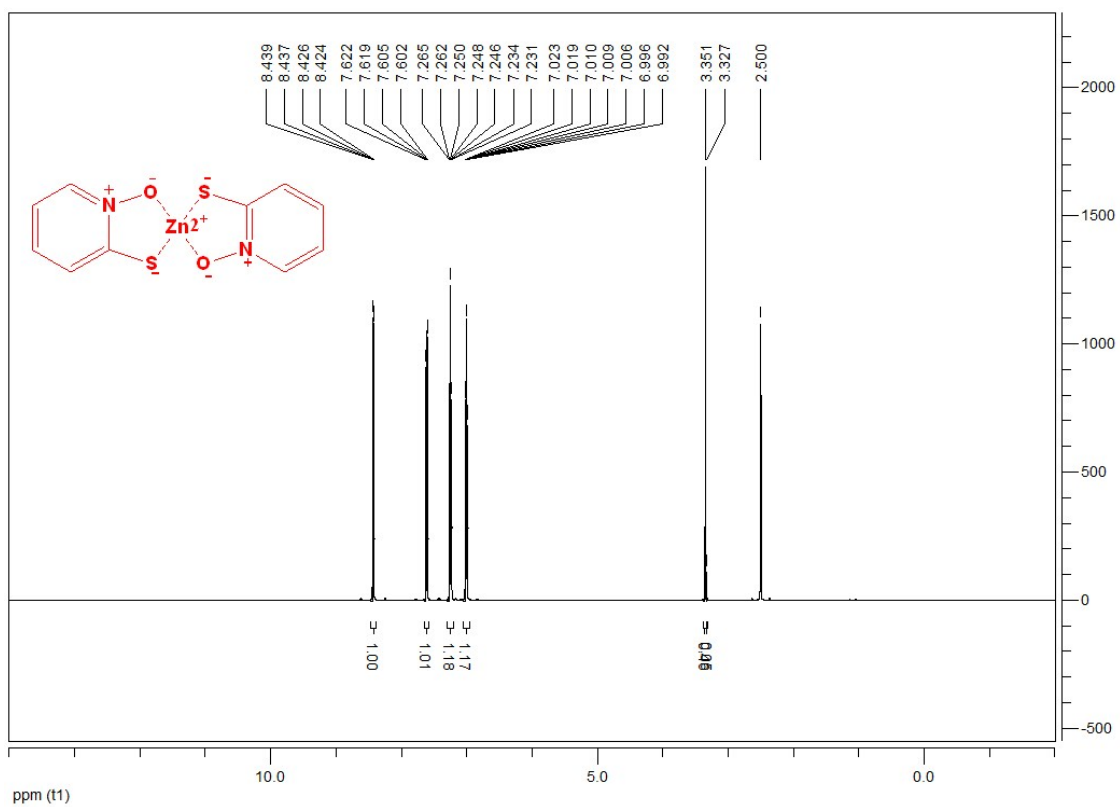

Figure S28.  $^1\text{H}$  NMR spectrum of Zinc Pyrithione.

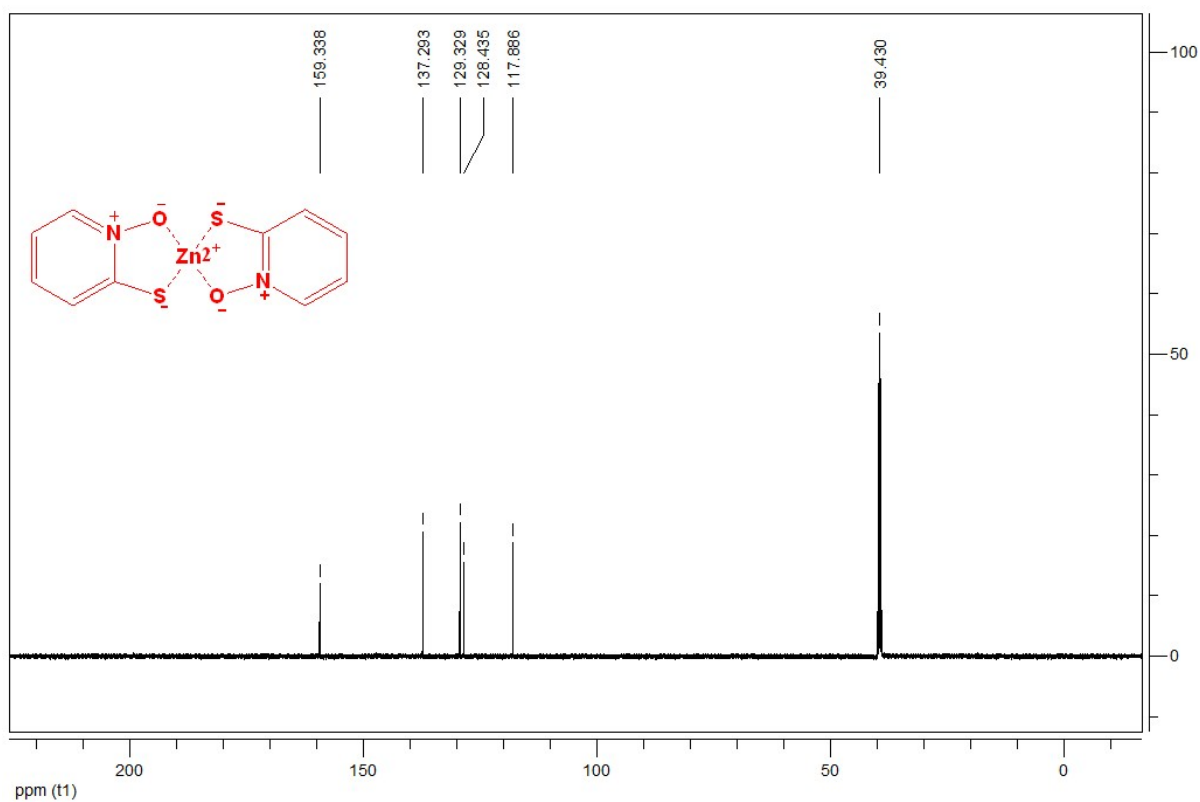

Figure S29.  $^{13}\text{C}$  NMR spectrum of Zinc Pyrithione.
